# Supplementary material for: Three pillared-layer 3d–4f heterometallic frameworks based on tetranuclear lanthanide clusters
Source: Royal Society of Chemistry journal article supplement (doi:10.1039/c3ce41010b), 2013-01-01
Supplement: c3ce41010b.pdf [file c3ce41010b.pdf]

## *Supporting Information*

# **Three Pillared-Layer 3d-4f Heterometallic Frameworks Based on Tetranuclear Lanthanide Clusters**

**Wei-Hui Fang, and Guo-Yu Yang\***

*State Key Laboratory of Structural Chemistry, Fujian Institute of Research on the Structure of Matter, Chinese Academy of Sciences, Fuzhou, Fujian 350002, China*

### **Contents**

|                                                                                              |   |
|----------------------------------------------------------------------------------------------|---|
| <b>Figure S1.</b> The experimental and simulated PXRD patterns of compounds <b>1-3</b> ..... | 2 |
| <b>Figure S2.</b> The IR spectra of compounds <b>1-3</b> .....                               | 2 |
| <b>Table S1.</b> Selected Bond Lengths (Å) for Compounds <b>1-3</b> .....                    | 3 |
| <b>Table S2.</b> Hydrogen Bond Lengths (Å) and Bond Angles (°) for compounds <b>1</b> .....  | 5 |

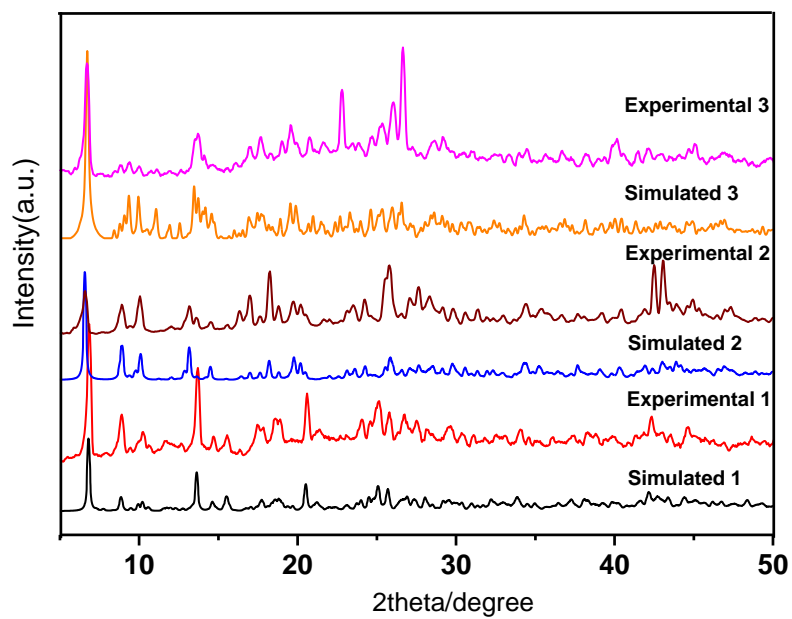

**Figure S1.** The experimental and simulated PXRD patterns of compounds 1-3.

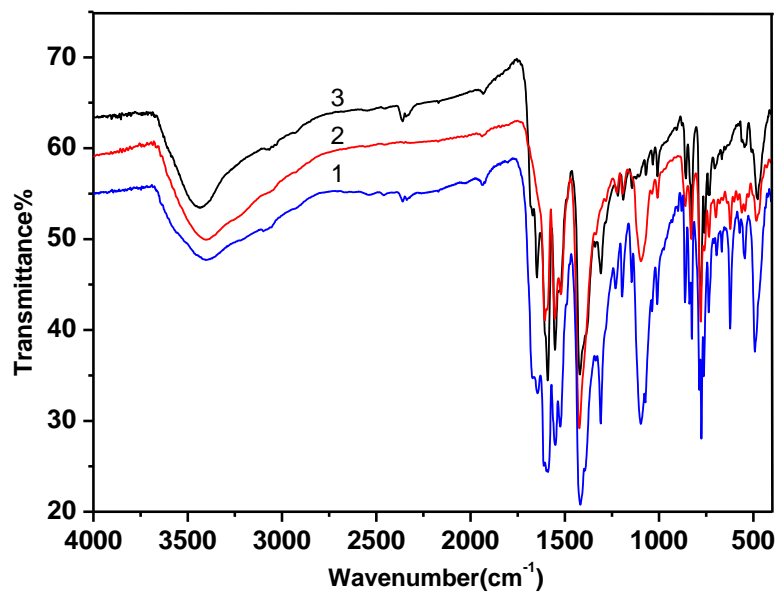

**Figure S2.** The IR spectra of compounds 1-3.

**Table S1.** Selected Bond Lengths (Å) for Compounds **1-3**

| Compound 1   |          |              |          |
|--------------|----------|--------------|----------|
| Gd(1)-O(1)   | 2.423(8) | Cu(2)-N(8)   | 1.904(1) |
| Gd(1)-O(1W)  | 2.390(9) | Cu(2)-N(9)B  | 1.905(1) |
| Gd(1)-O(2)   | 2.465(9) | Cu(3)-N(3)C  | 2.045(9) |
| Gd(1)-O(3)   | 2.511(7) | Cu(3)-I(1)   | 2.610(2) |
| Gd(1)-O(4)   | 2.390(9) | Cu(3)-I(2)   | 2.611(2) |
| Gd(1)-O(5)   | 2.328(9) | Cu(3)-I(7)D  | 2.874(2) |
| Gd(1)-O(7)   | 2.349(8) | Cu(4)-N(2)   | 2.038(1) |
| Gd(1)-O(11)  | 2.285(8) | Cu(4)-I(1)   | 2.652(2) |
| Gd(2)-O(2W)  | 2.378(1) | Cu(4)-I(2)   | 2.618(2) |
| Gd(2)-O(3W)  | 2.438(1) | Cu(4)-I(3)   | 2.841(2) |
| Gd(2)-O(4W)  | 2.378(1) | Cu(5)-N(1)C  | 2.051(1) |
| Gd(2)-O(6)   | 2.335(8) | Cu(5)-I(2)   | 2.894(2) |
| Gd(2)-O(8)   | 2.356(1) | Cu(5)-I(3)   | 2.624(2) |
| Gd(2)-O(9)   | 2.331(8) | Cu(5)-I(4)   | 2.574(9) |
| Gd(2)-O(15)  | 2.450(9) | Cu(6)-N(6)   | 2.006(1) |
| Gd(2)-O(16)  | 2.601(1) | Cu(6)-I(3)   | 2.665(2) |
| Gd(3)-O(5W)  | 2.646(1) | Cu(6)-I(4)   | 2.653(1) |
| Gd(3)-O(6W)  | 2.422(1) | Cu(6)-I(5)   | 2.813(3) |
| Gd(3)-O(10)  | 2.263(8) | Cu(7)-N(7)E  | 2.023(1) |
| Gd(3)-O(14)  | 2.361(1) | Cu(7)-I(3)   | 2.844(3) |
| Gd(3)-O(17)  | 2.330(9) | Cu(7)-I(5)   | 2.652(2) |
| Gd(3)-O(19)  | 2.422(9) | Cu(7)-I(6)   | 2.631(2) |
| Gd(3)-O(20)  | 2.550(9) | Cu(8)-N(10)  | 2.045(1) |
| Gd(3)-O(23)  | 2.322(8) | Cu(8)-I(5)   | 2.612(2) |
| Gd(4)-O(7W)  | 2.395(9) | Cu(8)-I(6)   | 2.613(2) |
| Gd(4)-O(8W)  | 2.412(1) | Cu(8)-I(7)   | 2.902(3) |
| Gd(4)-O(9W)  | 2.436(1) | Cu(9)-N(5)E  | 2.001(1) |
| Gd(4)-O(10W) | 2.334(1) | Cu(9)-I(5)   | 2.991(3) |
| Gd(4)-O(18)  | 2.247(1) | Cu(9)-I(7)   | 2.678(3) |
| Gd(4)-O(21)  | 2.431(1) | Cu(9)-I(8)   | 2.584(2) |
| Gd(4)-O(22)  | 2.566(1) | Cu(10)-N(12) | 2.060(1) |
| Gd(4)-O(24)  | 2.308(9) | Cu(10)-I(2)F | 2.880(3) |
| Cu(1)-N(11)A | 1.890(1) | Cu(10)-I(7)  | 2.628(2) |
| Cu(1)-N(4)   | 1.942(1) | Cu(10)-I(8)  | 2.620(2) |

Symmetry transformations used to generate equivalent atoms: A:  $x-1, y-1, z$ ; B:  $x-1, y, z$ ; C:  $x-1, -y, z-1/2$ ; D:  $x, y-1, z$ ; E:  $x-1, -y+1, z-1/2$ ; F:  $x, y+1, z$ .

**Compound 2**

|              |          |              |          |
|--------------|----------|--------------|----------|
| La(1)-O(1)   | 2.472(6) | La(2)-O(12)C | 2.475(5) |
| La(1)-O(2)A  | 2.564(6) | Cu(1)-N(1)   | 2.004(7) |
| La(1)-O(3)   | 2.481(5) | Cu(1)-I(1)   | 2.605(1) |
| La(1)-O(5)   | 2.443(5) | Cu(1)-I(2)   | 2.666(1) |
| La(1)-O(8)   | 2.431(5) | Cu(1)-I(3)   | 2.953(2) |
| La(1)-O(9)   | 2.449(5) | Cu(2)-N(2)D  | 2.013(7) |
| La(1)-O(11)B | 2.702(5) | Cu(2)-I(1)   | 2.650(1) |
| La(2)-O(1W)  | 2.578(6) | Cu(2)-I(1)E  | 2.703(1) |
| La(2)-O(2W)  | 2.564(7) | Cu(2)-I(2)   | 2.733(1) |
| La(2)-O(4)   | 2.469(5) | Cu(3)-N(3)   | 2.015(1) |
| La(2)-O(6)   | 2.554(5) | Cu(3)-I(2)F  | 2.635(1) |
| La(2)-O(7)B  | 2.467(5) | Cu(3)-I(3)   | 2.613(1) |
| La(2)-O(10)B | 2.513(5) | Cu(4)-N(4)F  | 1.883(7) |
| La(2)-O(11)C | 2.668(5) | Cu(4)-N(4)   | 1.883(7) |

Symmetry transformations used to generate equivalent atoms: A:  $-x+1/2, -y+3/2, -z+1$ ; B:  $-x+1/2, y+1/2, -z+1/2$ ;  
C:  $x, y+1, z$ ; D:  $x-1/2, y+1/2, z$ ; E:  $-x, -y+2, -z+1$ ; F:  $-x, y, -z+1/2$ .

**Compound 3**

|              |          |              |           |
|--------------|----------|--------------|-----------|
| La(1)-O(6)   | 2.593(8) | La(4)-O(28)D | 2.624(7)  |
| La(1)-O(7)   | 2.501(9) | Na-O(3W)     | 2.328(13) |
| La(1)-O(14)  | 2.608(8) | Na-O(6)      | 2.461(10) |
| La(1)-O(17)  | 2.735(8) | Na-O(9)D     | 2.930(12) |
| La(1)-O(19)  | 2.441(8) | Na-O(10)D    | 2.412(11) |
| La(1)-O(1W)  | 2.762(1) | Na-O(19)     | 2.841(10) |
| La(1)-O(22)  | 2.578(8) | Na-O(20)D    | 2.497(9)  |
| La(1)-O(27)  | 2.612(8) | Na-O(27)     | 2.423(9)  |
| La(1)-O(28)A | 2.641(8) | Cu(1)-I(1)   | 2.579(3)  |
| La(2)-O(1)   | 2.393(8) | Cu(1)-I(1)E  | 2.571(2)  |
| La(2)-O(2W)  | 2.522(1) | Cu(1)-N(1)   | 1.992(1)  |
| La(2)-O(4)   | 2.476(9) | Cu(2)-I(2)   | 2.567(3)  |
| La(2)-O(5)   | 2.469(9) | Cu(2)-I(3)   | 2.586(3)  |
| La(2)-O(16)  | 2.475(9) | Cu(2)-N(8)F  | 1.970(1)  |
| La(2)-O(17)  | 2.647(7) | Cu(3)-I(2)   | 2.700(2)  |
| La(2)-O(21)  | 2.466(9) | Cu(3)-I(3)   | 2.713(2)  |
| La(2)-O(22)  | 2.722(8) | Cu(3)-I(4)   | 2.695(2)  |
| La(3)-O(3)   | 2.527(8) | Cu(3)-N(2)   | 2.023(1)  |
| La(3)-O(11)  | 2.457(1) | Cu(4)-I(3)   | 2.750(2)  |
| La(3)-O(15)  | 2.446(1) | Cu(4)-N(3)B  | 1.942(1)  |
| La(3)-O(18)  | 2.666(7) | Cu(4)-N(6)F  | 1.930(1)  |
| La(3)-O(23)B | 2.496(9) | Cu(5)-I(2)   | 2.766(2)  |
| La(3)-O(24)B | 2.698(8) | Cu(5)-I(4)   | 2.644(2)  |
| La(3)-O(25)  | 2.535(9) | Cu(5)-I(5)   | 2.695(3)  |
| La(3)-O(26)C | 2.532(9) | Cu(5)-N(7)F  | 2.048(1)  |
| La(4)-O(8)B  | 2.486(8) | Cu(6)-I(4)   | 2.748(2)  |

|              |          |             |           |
|--------------|----------|-------------|-----------|
| La(4)-O(9)   | 2.457(9) | Cu(6)-I(5)  | 2.672(3)  |
| La(4)-O(12)  | 2.463(1) | Cu(6)-I(6)  | 2.671(2)  |
| La(4)-O(13)B | 2.482(8) | Cu(6)-N(4)B | 2.036(1)  |
| La(4)-O(18)  | 2.659(8) | Cu(7)-I(5)  | 2.566(2)  |
| La(4)-O(20)  | 2.454(8) | Cu(7)-I(6)  | 2.514(2)  |
| La(4)-O(24)B | 2.535(8) | Cu(7)-N(5)G | 1.971(11) |

Symmetry transformations used to generate equivalent atoms: A:  $-x+2, -y, -z+1$ ; B:  $x-1, y, z$ ; C:  $-x+1, -y+1, -z+1$ ; D:  $-x+1, -y, -z+1$ ; E:  $-x+4, -y+1, -z+2$ ; F:  $x, y, z+1$ ; G:  $x+1, y, z+1$ .

**Table S2.** Hydrogen Bond Lengths (Å) and Bond Angles (°) for compounds **1**<sup>a</sup>

| D-H...A                         | d(D-H) | d(H...A) | d(D...A) | <DHA  |
|---------------------------------|--------|----------|----------|-------|
| O2W-H(2WB)...O8W <sup>G</sup>   | 0.93   | 2.38     | 3.25(1)  | 158.9 |
| O3W-H(3WB)...O12 <sup>G</sup>   | 0.88   | 2.05     | 2.76(1)  | 137.5 |
| O4W-H(4WA)...O11                | 0.88   | 2.28     | 2.89(1)  | 127.1 |
| O4W-H(4WB)...O5                 | 0.89   | 2.48     | 3.10(1)  | 128.6 |
| O5W-H(5WB)...O12                | 0.94   | 2.11     | 2.95(1)  | 149.4 |
| O6W-H(6WB)...O16                | 0.86   | 2.08     | 2.79(1)  | 140.5 |
| O7W-H(7WA)...O14                | 0.85   | 2.48     | 3.09(1)  | 129.6 |
| O7W-H(7WB)...O1 <sup>F</sup>    | 0.85   | 2.27     | 2.69(1)  | 111.4 |
| O8W-H(8WB)...O2 <sup>H</sup>    | 0.86   | 2.38     | 3.18(2)  | 155.7 |
| O9W-H(9WA)...O14 <sup>I</sup>   | 0.87   | 2.04     | 2.87(2)  | 159.5 |
| O9W-H(9WB)...O13W <sup>F</sup>  | 0.87   | 2.44     | 3.30(3)  | 169.2 |
| O11W-H(11A)...O4 <sup>F</sup>   | 0.85   | 2.28     | 2.86(2)  | 125.5 |
| O12W-H(12A)...O3W               | 0.85   | 2.09     | 2.74(2)  | 132.6 |
| O13W-H(13A)...O21 <sup>D</sup>  | 0.85   | 2        | 2.82(3)  | 161.9 |
| O13W-H(13B)...O12W <sup>H</sup> | 0.85   | 2.37     | 2.90(3)  | 121.1 |

<sup>a</sup> Symmetry codes: D:  $x, y-1, z$ ; F:  $x, y+1, z$ ; G:  $x, -y+1, z+1/2$ ; H:  $x, -y+1, z-1/2$ ; I:  $x, -y+2, z-1/2$ .
